# Supplementary material
Source: publisher figshare collection journal article supplement (https://gsapubs.figshare.com/ndownloader/files/22756529)
Supplement: Supplementary file 1 [file 22756529]

## **ITEMS FOR UNRUH DATA REPOSITORY**

### **i) List of Data Repository Tables**

Table DR-1: SHRIMP-RG U-Pb age data for detrital zircons from Mt. Diablo sample MD96-4.

Table DR-2: Fission track sample locality, counting, and age data from Mt. Diablo area.

Table DR-3: (U-Th)/He analytical data for individual apatite grains from samples from the Mt. Diablo area.

Table DR-4: Modeling of (U-Th)/He ages from the Mt. Diablo area.

### **ii) Figure Captions for Figures Included Within the Data Repository**

Figure DR-1: Histograms of fission track lengths from ten additional samples. Data from seven of these samples, along with fission track dpar data included in Figure DR2, were used as inputs into fission track modeling programs. The modeled output histories from these samples are shown in Figure DR3.

Figure DR-2: Plots of the fission track dpar parameter for each track length measurement and each single-grain age determination for sixteen fission track samples. The dpar parameter (Donelick, 1993; Ketcham et al., 1999, 2000) correlates with the annealing kinetics of the apatite grains and is used as an input for fission track modeling shown in Figures 9 and DR3. For the modeling, the approach taken was to divide the data into three populations based on dpar, such that most of the data fell in the middle population and the other two populations were dominated by outliers. The low and high dpar

populations (shaded) were then discarded and only the central population was modeled, using its midpoint dpar value. Dpar data were not collected from Franciscan samples 95SF-004 and 95SF-005 because only 13 and 9 track lengths, respectively, were available for measurement in these samples (Figure 9). Sample 97SF-006, from the "Knoxville" unit of the Great Valley Group, exhibits a wide spread in dpar values and in addition its structural setting is poorly understood. For these reasons, these three samples were not modeled.

Figure DR-3: Fission track modeling plots for seven of the samples shown in Figure DR1. See Figure 11 for key.

Figure DR-4: Plots of degree of resetting of single-grain (U-Th)/He ages versus two proxies for the magnitude of alpha-decay-induced radiation damage in individual apatite grains. Degree of resetting is the same as in Figure 9B. In (A), X values are effective U (eU) for each grain;  $eU = U + 0.235 \cdot Th$  (concentrations in parts per million), as defined by Shuster et al., 2006. eU is an accurate proxy for the current mean rate of alpha decay per unit volume within each grain. In (B), X values are the product of eU and eTime. eTime is He start age minus 3.5 m.y., as in Figure 9B. These X values are therefore a tentative proxy for the current mean density of radiation damage within each grain. Shuster et al. (2006) proposed that radiation damage causes retardation of He diffusion by "trapping" He within damaged zones. Such a model predicts a positive correlation (positive slope) in plots such as these, with more damaged grains yielded older ages. However, these plots show no apparent correlation. This indicates that the radiation

damage model does not explain the wide spread in single grain He ages observed at Mt Diablo. We therefore ascribe the variable single-grain diffusion behavior observed in the Mt Diablo samples to some other unknown mechanism.

It should be noted that the model of Shuster et al. (2006) may require some minimum level of radiation damage before inducing detectable variations in single-grain ages. The levels of radiation damage in our samples are probably relatively low compared to examples cited by Shuster et al. (2006) and Green et al. (2006). Therefore, even though the radiation-damage model does not appear to explain our data, our data do not necessarily indicate that the radiation-damage model is incorrect.

It should also be noted that the magnitude of differences in single-grain diffusion parameters needed to explain our data (Figure 9C) are relatively small compared to the radiation-induced differences proposed by Shuster et al. (2006). They therefore probably represent some separate mechanism of unknown physical nature. Because the differences are small, they would be expected to cause variations in single-grain ages only under quite restricted time-temperature histories. Histories with late reheating to temperatures near the middle of the He partial retention zone (about 75°C), such as seen at Mt. Diablo, are most likely to cause detectable single-grain age variations.

Figure DR-5: We assume a kink-band-propagation style of folding (Suppe, 1983; Suppe and Medwedeff, 1990), and account for the effect of distributed simple shear in the fold limbs by using a graphical approach to transform pre-existing faults and bedding contacts

from the deformed to the undeformed state (DR-5a). Shearing of fold limbs during deformation is illustrated by comparing the geometry of the parallelogram defined by the A and B hinge lines in the deformed (DR-5a) and restored (DR-5b) states. We assume that shear during fold growth is accommodated by distributed reverse slip along planes parallel to dip of the fold limb; in general, these planes need not be parallel to bedding. In cross-section, the shear planes are lines of no finite extension. Intersections of bedding, faults and other features with these lines form a grid of points that is used graphically to map the deformed geometry (DR-5a) to the restored geometry (DR-5b). Although the distances between points along the lines are the same in both the deformed and restored states, the lengths and angular relationships of lines that connect these points between lines are different in the two states due to simple shear of the fold limb.

**ADDITIONAL REFERENCES CITED ONLY IN DATA REPOSITORY ITEMS**

- Black, L.P., Kamo, S.L., Allen, C.M., Davis, D.W., Aleinikoff, J.N., Valley, J.W., Mundil, R., Campbell, I.H., Korsch, R.J., Williams, I.S., and Foudoulis, C., 2004, Improved  $^{206}\text{Pb}/^{238}\text{U}$  microprobe geochronology by the monitoring of a trace-element-related matrix effect: SHRIMP, ID-TIMS, ELA-ICP-MS and oxygen isotope documentation for a series of zircon standards: *Chemical Geology*, v. 205, p. 115-140.
- Dumitru, T.A., 1993, A new computer-automated microscope stage system for fission track analysis: *Nuclear Tracks and Radiation Measurements*, v. 21, p. 575-580.
- Farley, K.A., Wolf, R.W., and Silver, L.T., 1996, The effects of long alpha-stopping distances on (U-Th)/He ages: *Cosmochimica et Geochimica Acta*, v. 60, p. 4223-4229.
- Galbraith, R.F., 1981, On statistical models for fission track counts: *Mathematical Geology*, v. 13, p. 471-478.
- Galbraith, R.F., and Laslett, G.M., 1993, Statistical models for mixed fission track ages: *Nuclear Tracks and Radiation Measurements*, v. 21, p. 459-470.
- Green, P.F., 1981, A new look at statistics in fission-track dating: *Nuclear Tracks and Radiation Measurements*, v. 5, p. 77-86.
- House, M.A., Farley, K.A., and Stockli, D., 2000, Helium chronometry of apatite and titanite using Nd-YAG laser heating: *Earth and Planetary Science Letters*, vol. 183, pp. 365-368.
- Hurford, A.J., and Green, P.F., 1983, The zeta age calibration of fission-track dating: *Chemical Geology*, v. 41, p. 285-317.
- Ireland, T.R., and Williams, I.S., 2003, Considerations in zircon geochronology by SIMS: *Reviews in Mineralogy and Geochemistry*, v. 53, p. 215-241.
- Ketcham, R.A., Donelick, R.A., and Carlson, W.D., 1999, Variability of apatite fission-track annealing kinetics. 3. Extrapolation to geological time scales: *American Mineralogist*, v. 84, p. 1235-1255.
- Laslett, G.M., Kendall, W.S., Gleadow, A.J.W., and Duddy, I.R., 1982, Bias in the measurement of fission track length distributions: *Nuclear Tracks and Radiation Measurements*, v. 6, p. 79-85.
- Ludwig, K.R., 2001, *Squid: Special Publication 2*, Berkeley Geochronology Center, Berkeley, California.
- Suppe, J., 1983, Geometry and kinematics of fault-bend folding: *American Journal of Science*, v. 283, p. 684-721.
- Suppe, J., and Medwedeff, D.A., 1990, Geometry and kinematics of fault-propagation folding: *Eclogae Geologicae Helveticae*, v. 83, p. 409-454.
- Williams, I.S., 1997, U-Th-Pb geochronology by ion microprobe: *Reviews in Economic Geology*, v. 7, p. 1-35.

Table DR1. SHRIMP-RG U-Pb AGES OF DETRITAL ZIRCONS FROM MT. DIABLO SAMPLE MD96-4.

| Zircon Grain Number | % com-mon 206Pb | ppm U | ppm Th | <sup>232</sup> Th / <sup>238</sup> U | 207Pb corrected 206Pb / <sup>238</sup> U | 1s err | 207Pb corrected 206Pbr / <sup>238</sup> U Age | 1s err     | Uncor-rected <sup>238</sup> U / <sup>206</sup> Pb | % err | Uncorrected 207Pb / <sup>206</sup> Pb | % err |
|---------------------|-----------------|-------|--------|--------------------------------------|------------------------------------------|--------|-----------------------------------------------|------------|---------------------------------------------------|-------|---------------------------------------|-------|
| 7                   | 0.73            | 215   | 61     | 0.29                                 | .0167                                    | ####   | <b>106.6</b>                                  | <b>1.7</b> | 59.52                                             | 1.6   | .0539                                 | 4.9   |
| 10                  | 0.65            | 282   | 115    | 0.42                                 | .0168                                    | ####   | <b>107.4</b>                                  | <b>1.5</b> | 59.14                                             | 1.4   | .0533                                 | 4.6   |
| 24                  | 0.61            | 271   | 139    | 0.53                                 | .0170                                    | ####   | <b>108.8</b>                                  | <b>1.6</b> | 58.40                                             | 1.4   | .0530                                 | 4.6   |
| 22                  | 0.24            | 141   | 77     | 0.56                                 | .0225                                    | ####   | <b>143.4</b>                                  | <b>2.6</b> | 44.36                                             | 1.8   | .0508                                 | 5.8   |
| 4                   | 0.47            | 240   | 112    | 0.48                                 | .0238                                    | ####   | <b>151.9</b>                                  | <b>2.0</b> | 41.74                                             | 1.3   | .0529                                 | 4.2   |
| 1                   | 0.05            | 167   | 74     | 0.46                                 | .0249                                    | ####   | <b>158.5</b>                                  | <b>2.5</b> | 40.16                                             | 1.6   | .0496                                 | 5.1   |
| 29                  | -0.22           | 273   | 73     | 0.28                                 | .0254                                    | ####   | <b>161.7</b>                                  | <b>2.0</b> | 39.46                                             | 1.2   | .0475                                 | 4.0   |
| 26                  | 0.40            | 241   | 184    | 0.79                                 | .0254                                    | ####   | <b>161.8</b>                                  | <b>2.1</b> | 39.18                                             | 1.3   | .0524                                 | 4.0   |
| 15                  | 0.63            | 83    | 24     | 0.29                                 | .0255                                    | ####   | <b>162.4</b>                                  | <b>3.8</b> | 38.95                                             | 2.3   | .0543                                 | 6.9   |
| 16                  | 0.08            | 1012  | 1138   | 1.16                                 | .0256                                    | ####   | <b>162.9</b>                                  | <b>1.0</b> | 39.04                                             | 0.6   | .0500                                 | 2.1   |
| 28                  | 0.26            | 670   | 675    | 1.04                                 | .0256                                    | ####   | <b>163.2</b>                                  | <b>1.2</b> | 38.89                                             | 0.8   | .0514                                 | 2.4   |
| 2                   | 0.06            | 616   | 339    | 0.57                                 | .0258                                    | ####   | <b>164.2</b>                                  | <b>1.3</b> | 38.75                                             | 0.8   | .0498                                 | 2.6   |
| 17                  | 0.15            | 425   | 218    | 0.53                                 | .0261                                    | ####   | <b>165.9</b>                                  | <b>1.6</b> | 38.30                                             | 1.0   | .0506                                 | 3.1   |
| 21                  | -0.22           | 686   | 755    | 1.14                                 | .0262                                    | ####   | <b>167.0</b>                                  | <b>1.3</b> | 38.18                                             | 0.8   | .0476                                 | 2.5   |
| 25                  | 0.16            | 986   | 1312   | 1.38                                 | .0265                                    | ####   | <b>168.5</b>                                  | <b>1.1</b> | 37.71                                             | 0.6   | .0507                                 | 2.0   |
| 23                  | 0.90            | 174   | 91     | 0.54                                 | .0266                                    | ####   | <b>169.3</b>                                  | <b>2.7</b> | 37.25                                             | 1.6   | .0566                                 | 4.7   |
| 27                  | 0.47            | 570   | 430    | 0.78                                 | .0266                                    | ####   | <b>169.4</b>                                  | <b>1.4</b> | 37.37                                             | 0.8   | .0532                                 | 2.5   |
| 9                   | 0.42            | 511   | 335    | 0.68                                 | .0268                                    | ####   | <b>170.6</b>                                  | <b>1.5</b> | 37.14                                             | 0.9   | .0528                                 | 2.8   |
| 18                  | 0.70            | 177   | 91     | 0.53                                 | .0272                                    | ####   | <b>172.7</b>                                  | <b>2.5</b> | 36.57                                             | 1.4   | .0551                                 | 4.4   |
| 11                  | -0.01           | 703   | 443    | 0.65                                 | .0275                                    | ####   | <b>174.7</b>                                  | <b>1.2</b> | 36.41                                             | 0.7   | .0495                                 | 2.2   |
| 14                  | 0.16            | 649   | 425    | 0.68                                 | .0275                                    | ####   | <b>175.2</b>                                  | <b>1.4</b> | 36.25                                             | 0.8   | .0508                                 | 2.5   |
| 3                   | 0.25            | 226   | 106    | 0.49                                 | .0277                                    | ####   | <b>176.1</b>                                  | <b>2.3</b> | 36.02                                             | 1.3   | .0516                                 | 4.1   |
| 20                  | 0.32            | 215   | 99     | 0.47                                 | .0277                                    | ####   | <b>176.3</b>                                  | <b>2.4</b> | 35.95                                             | 1.3   | .0522                                 | 4.2   |
| 12                  | 0.29            | 234   | 116    | 0.51                                 | .0286                                    | ####   | <b>181.7</b>                                  | <b>2.3</b> | 34.87                                             | 1.3   | .0520                                 | 4.0   |
| 6                   | -0.11           | 254   | 124    | 0.50                                 | .0290                                    | ####   | <b>184.1</b>                                  | <b>2.2</b> | 34.56                                             | 1.2   | .0489                                 | 3.9   |
| 19                  | 0.11            | 271   | 138    | 0.53                                 | .0291                                    | ####   | <b>185.1</b>                                  | <b>2.2</b> | 34.29                                             | 1.2   | .0507                                 | 3.8   |
| 13                  | 0.58            | 643   | 475    | 0.76                                 | .0291                                    | ####   | <b>185.2</b>                                  | <b>1.4</b> | 34.12                                             | 0.7   | .0544                                 | 2.3   |
| 30                  | 0.45            | 373   | 121    | 0.33                                 | .0300                                    | ####   | <b>190.8</b>                                  | <b>1.9</b> | 33.14                                             | 1.0   | .0535                                 | 3.0   |
| 8                   | 0.56            | 139   | 27     | 0.20                                 | .0343                                    | ####   | <b>217.2</b>                                  | <b>3.3</b> | 29.01                                             | 1.5   | .0549                                 | 4.6   |
| 5                   | 0.16            | 217   | 27     | 0.13                                 | .0386                                    | ####   | <b>244.3</b>                                  | <b>2.8</b> | 25.85                                             | 1.2   | .0523                                 | 3.5   |

The following is a summary of key laboratory procedures. Zircons were separated using standard heavy liquid and magnetic methods (e.g., Dumitru, 2000). The final step of magnetic separation was completed using a Frantz Isodynamic separator with a current setting of 1.8 amps and a side slope of 5 degrees. Individual zircon grains were selected under the binocular microscope, embedded in epoxy, and ground and polished to a 1 micron finish to allow analysis of grain internal surfaces. Grain internal surfaces were imaged under cathodoluminescence (CL) and under reflected plane light.

Isotopic analyses were performed in March 2006 on the SHRIMP-RG at the Stanford-USGS Microisotopic Analytical Center, using methods similar to Surpless et al. (2006). The spot size of the O<sub>2</sub>- primary beam was approximately 30-40 microns; each analysis consisted of four scans for each isotope mass. Concentrations were standardized against the CZ3 zircon standard (550 ppm U). Ages were standardized against the R33 zircon standard (419 Ma ID-TIMS age; Black et al., 2004). The operator analyzed 30 individual grains, using the images to attempt to sample the full range of zircon grain types present on the mount, rather than sampling at random. This strategy was selected because a key goal was to bracket the depositional age of the sample using the youngest zircons and because instrument time was limited. Data reduction followed the methods of Williams (1997) and Ireland and Williams (2003), using the Squid and Isoplot programs of Ludwig (2001, 2003).

After the age analyses were completed, the CL images and reflected light images were reexamined. This indicated that, for this sample, it was not possible to sort grains into different age populations based on the images alone.

TABLE DR2. FISSION TRACK SAMPLE LOCALITY, COUNTING, AND AGE DATA FROM MT. DIABLO AREA

| Sample                            | Irradiation | Latitude    | Longitude    | No  | Spontaneous |      | Induced |      | P( $\chi^2$ ) | Dosimeter |      | Age $\pm 1\sigma$ |
|-----------------------------------|-------------|-------------|--------------|-----|-------------|------|---------|------|---------------|-----------|------|-------------------|
| number                            | number      | (North)     | (West)       | Xls | Rho-S       | NS   | Rho-I   | NI   | (%)           | Rho-D     | ND   | (Ma)              |
| <b>Great Valley Group Samples</b> |             |             |              |     |             |      |         |      |               |           |      |                   |
| 97SF-006                          | SU040-06    | 37° 54' 29" | 121° 55' 18" | 36  | 0.2529      | 735  | 0.5178  | 1505 | 86            | 1.4740    | 4197 | 137.0 $\pm$ 7.2   |
| 98SF-201                          | SU046-05    | 37° 49' 36" | 121° 50' 54" | 10  | 1.1260      | 611  | 3.5710  | 1937 | 38            | 1.4525    | 4268 | 87.8 $\pm$ 4.3    |
| 98SF-206                          | SU046-07    | 37° 49' 54" | 121° 50' 08" | 18  | 0.6082      | 538  | 1.3830  | 1223 | 63            | 1.4780    | 4268 | 124.2 $\pm$ 6.7   |
| 98SF-209                          | SU046-08    | 37° 50' 17" | 121° 48' 58" | 12  | 1.3610      | 692  | 3.3360  | 1696 | 7.4           | 1.4780    | 4268 | 115.7 $\pm$ 7.1   |
| 98SF-210                          | SU046-09    | 37° 50' 45" | 121° 47' 56" | 17  | 0.9623      | 971  | 2.3790  | 2401 | <0.1          | 1.5034    | 4268 | 119.2 $\pm$ 7.7   |
| 98SF-211                          | SU046-10    | 37° 50' 37" | 121° 48' 12" | 26  | 1.0630      | 1240 | 2.8780  | 3357 | 6.3           | 1.5034    | 4268 | 106.5 $\pm$ 4.8   |
| 98SF-212                          | SU046-11    | 37° 50' 35" | 121° 48' 37" | 25  | 1.1890      | 1047 | 2.7250  | 2400 | 26            | 1.5288    | 4268 | 128.6 $\pm$ 5.8   |
| 98SF-213                          | SU046-12    | 37° 51' 09" | 121° 47' 14" | 27  | 1.0790      | 1234 | 2.7100  | 3098 | 1.2           | 1.5288    | 4268 | 115.4 $\pm$ 5.5   |
| 98SF-216                          | SU046-14    | 37° 51' 47" | 121° 46' 14" | 25  | 0.7907      | 1409 | 2.5370  | 4520 | 0.2           | 1.5670    | 4268 | 90.7 $\pm$ 4.2    |
| 98SF-219*                         | SU046-15    | 37° 54' 32" | 121° 45' 51" | 14  | 0.7940      | 511  | 2.7610  | 1777 | 43            | 1.5670    | 4268 | 86.4 $\pm$ 4.5    |
| 98SF-221                          | SU046-16    | 37° 52' 31" | 121° 45' 40" | 25  | 1.2200      | 936  | 4.2220  | 3238 | 0.3           | 1.5924    | 4268 | 89.0 $\pm$ 5.0    |
| <b>Franciscan Complex Samples</b> |             |             |              |     |             |      |         |      |               |           |      |                   |
| MD96-1                            | SU033-16    | 37° 52' 53" | 121° 54' 48" | 24  | 0.7193      | 479  | 4.0350  | 2687 | <0.1          | 1.6770    | 4639 | 59.0 $\pm$ 5.0    |
| MD96-4                            | SU033-19    | 37° 52' 32" | 121° 55' 43" | 29  | 0.8165      | 1470 | 4.3170  | 7773 | <0.1          | 1.7195    | 4639 | 63.0 $\pm$ 3.0    |
| MD96-7                            | SU033-22    | 37° 52' 23" | 121° 56' 57" | 40  | 0.6989      | 1755 | 3.9000  | 9794 | 63            | 1.7408    | 4639 | 59.9 $\pm$ 1.8    |
| 97SF-001                          | SU040-01    | 37° 53' 26" | 121° 54' 49" | 31  | 0.8726      | 911  | 4.0060  | 4182 | 0.5           | 1.3971    | 4179 | 60.0 $\pm$ 3.2    |
| 97SF-003                          | SU040-03    | 37° 53' 58" | 121° 54' 42" | 32  | 0.3712      | 629  | 1.6190  | 2743 | 15            | 1.4125    | 4179 | 62.2 $\pm$ 2.9    |
| 97SF-004                          | SU040-04    | 37° 54' 07" | 121° 54' 52" | 13  | 0.5769      | 106  | 2.2100  | 406  | 54            | 1.4432    | 4179 | 72.3 $\pm$ 8.0    |
| 97SF-005                          | SU040-05    | 37° 54' 11" | 121° 55' 00" | 8   | 0.2963      | 53   | 1.4420  | 258  | 58            | 1.4432    | 4179 | 57.2 $\pm$ 8.9    |

\* Eocene sample.

*Note:* Abbreviations are: No Xls, number of individual crystals (grains) dated; Rho-S, spontaneous track density ( $\times 10^6$  tracks per square centimeter); NS, number of spontaneous tracks counted; Rho-I, induced track density in muscovite external detector ( $\times 10^6$  tracks per square centimeter); NI, number of induced tracks counted; P( $\chi^2$ ),  $\chi^2$  probability (Galbraith, 1981; Green, 1981); Rho-D, induced track density in external detector adjacent to dosimetry glass ( $\times 10^6$  tracks per square centimeter); ND, number of tracks counted in determining Rho-D. Age is the sample central fission track age (Galbraith and Laslett, 1993), calculated using zeta calibration method (Hurford and Green, 1983). Analyst: T. A. Dumitru.

The following is a summary of key laboratory procedures. Apatites were etched for 20 s in 5N nitric acid at room temperature. Grains were dated by external detector method with muscovite detectors. Samples were irradiated in well thermalized positions of Oregon State University reactor. CN5 dosimetry glasses with muscovite external detectors were used as neutron flux monitors. External detectors were etched in 48% HF. Tracks counted with Zeiss Axioskop microscope with 100x air objective, 1.25x tube factor, 10x eyepieces, transmitted light with supplementary reflected light as needed; external detector prints were located with Kinetek automated scanning stage (Dumitru, 1993). Only grains with c axes subparallel to slide plane were dated. Ages calculated using zeta calibration factor of 385.9. Confined tracks lengths were measured only in apatite grains with c axes subparallel to slide plane; only horizontal tracks measured (within  $\pm 5$ -10°), following protocols of Laslett and others (1982). Lengths were measured with computer digitizing tablet and drawing tube, calibrated against stage micrometer (Dumitru, 1993). For the sixteen samples that contained at least 41 measurable confined tracks, angles of confined tracks to the grains' c-axes and the Dpar track entrance diameter where also measured, following protocols of Ketcham and others (1999, 2000), except that confined tracks hosted by surface tracks and by cleavage surfaces were both measured. Age calculations were done with program by D. Coyle.

The following is a summary of thermal history modeling methods. Modeling done with the AFTSolve 1.1.2 program of Ketcham and others (2000). Modeling parameters: (1) used raw track length data (actual lengths, Dpar, and angle to c-axis of each track) and actual track counts (NS, NI, and Dpar of each grain); (2) used annealing model of Ketcham and others (1999) with Dpar kinetic variable; (3) for each sample, divided all data (lengths and track counts) into three kinetic populations based on Dpar such that almost all data fell within the center population, then discarded all but the center population; (4) modeled the center population using its midpoint Dpar value; (5) for length reduction in age standard, used default value of 0.893; (6) for initial track length, used default relations  $L_{om} = (0.283)(Dpar) + 15.630 \mu m$  and  $L_{oc} = (0.205)(Dpar) + 16.100 \mu m$ ; (7) did not project track lengths to c-axis parallel; (8) calculated 2000 model paths with Monte Carlo scheme, with each path segment monotonic and each segment halved one time, and without enforcing maximum heating or cooling rates; (9) output plots show best single run, good model fit envelope, and acceptable model fit envelope. No adjustments made for slight difference in etching conditions between Ketcham and others (1999, 2000) (20 seconds, 21°C, 5.5 N HNO<sub>3</sub>) and our laboratory (20 seconds, room temperature [ $\sim 22^\circ C$ ], 5.0 N HNO<sub>3</sub>), nor for likely minor interlaboratory differences in length reduction in age standard or initial track length relationships.

Unruh et al., Diablo, Table DR2  
Microsoft Word 2004 for Mac, v 11.3 file

**TABLE DR3. He ANALYTICAL DATA FOR INDIVIDUAL APATITE GRAINS FROM SAMPLES FROM MT. DIA**

| He ref | Sample and Grain | Grain Designation | U (ppm) | Th (ppm) | He (nmol/g) | Age (Ma) Raw | Grain radius (microns) | Grain length (microns) | Grain mass (µg) | Ft factor | Age (Ma) Ft Corrected |
|--------|------------------|-------------------|---------|----------|-------------|--------------|------------------------|------------------------|-----------------|-----------|-----------------------|
| 01HRZ  | 97SF006fn(c)     | --                | 9.320   | 19.170   | 0.751       | 9.984        | 39.998                 | 351.411                | 3.019           | 0.688     | 14.513                |
| 01HSA  | 97SF006fn(d)     | --                | 1.258   | 3.674    | 0.274       | 23.704       | 42.855                 | 257.130                | 2.536           | 0.692     | 34.230                |
| 01HRX  | 97SF006fn(a)     | --                | 3.318   | 9.949    | 0.820       | 26.614       | 57.140                 | 342.840                | 6.010           | 0.763     | 34.848                |
| 01HRY  | 97SF006fn(b)     | --                | 2.993   | 3.945    | 1.089       | 50.896       | 57.140                 | 325.698                | 5.710           | 0.768     | 66.216                |
| 01HRU  | 97SF006cs(b)     | --                | 2.013   | 4.494    | 0.518       | 30.960       | 74.282                 | 385.695                | 11.427          | 0.814     | 38.032                |
| 01HRV  | 97SF006md(a)     | --                | 1.725   | 3.974    | 0.421       | 29.091       | 74.282                 | 291.414                | 8.634           | 0.805     | 36.116                |
| 01HRS  | 97SF006cs(a)     | --                | 1.459   | 3.317    | 0.327       | 26.853       | 77.139                 | 419.979                | 13.418          | 0.821     | 32.697                |
| 01HRW  | 97SF006md(b)     | --                | 1.793   | 3.660    | 0.195       | 13.518       | 77.139                 | 325.698                | 10.406          | 0.815     | 16.580                |
| 01HQH  | 98SF201(a)TD     | e                 | 37.393  | 84.819   | 6.410       | 20.542       | 37.141                 | 188.562                | 1.397           | 0.645     | 31.805                |
| 01HQI  | 98SF201(b)TD     | f                 | 31.922  | 61.739   | 4.999       | 19.780       | 39.998                 | 274.272                | 2.356           | 0.681     | 29.030                |
| 01HQJ  | 98SF201(c)TD     | g                 | 42.450  | 50.360   | 5.431       | 18.382       | 45.712                 | 171.420                | 1.923           | 0.697     | 26.350                |
| 01HQB  | 98SF201(d)TD     | h                 | 22.549  | 20.643   | 5.166       | 34.594       | 45.712                 | 308.556                | 3.462           | 0.722     | 47.848                |
| 01HQL  | 98SF201(e)TD     | i                 | 27.905  | 23.193   | 5.099       | 28.066       | 62.854                 | 257.130                | 5.454           | 0.779     | 36.001                |
| 01HQM  | 98SF201(f)TD     | j                 | 19.634  | 43.419   | 8.126       | 49.922       | 68.568                 | 385.695                | 9.736           | 0.801     | 62.271                |
| 01HTL  | 98SF216(a)cs     | k                 | 26.353  | 51.915   | 6.052       | 28.819       | 62.854                 | 299.985                | 6.363           | 0.780     | 36.929                |
| 01HTM  | 98SF216(b)cs     | l                 | 5.537   | 1.286    | 0.600       | 18.865       | 62.854                 | 291.414                | 6.181           | 0.786     | 23.977                |
| 01HTN  | 98SF216(c)fn     | m                 | 14.784  | 38.718   | 5.092       | 39.119       | 45.712                 | 231.417                | 2.596           | 0.704     | 55.469                |
| 01HTP  | 98SF216(d)fn     | n                 | 104.291 | 114.461  | 6.683       | 9.368        | 42.855                 | 171.420                | 1.690           | 0.683     | 13.708                |
| 01HRO  | 98SF212(a)TD     | o                 | 25.401  | 43.007   | 5.785       | 29.908       | 37.141                 | 231.417                | 1.714           | 0.657     | 45.463                |
| 01HRP  | 98SF212(b)TD     | p                 | 21.662  | 23.436   | 2.027       | 13.711       | 37.141                 | 222.846                | 1.651           | 0.659     | 20.800                |
| 01HRR  | 98SF212(d)TD     | q                 | 47.752  | 25.390   | 7.351       | 25.127       | 48.569                 | 359.982                | 4.559           | 0.742     | 33.843                |
| 01HRQ  | 98SF212(c)TD     | r                 | 20.078  | 33.017   | 3.126       | 20.631       | 51.426                 | 248.559                | 3.529           | 0.736     | 28.000                |
| 01HTQ  | 98SF221(a)cs     | a                 | 23.336  | 52.351   | 3.141       | 16.199       | 51.426                 | 222.846                | 3.164           | 0.730     | 22.186                |
| 01HTR  | 98SF221(b)cs     | b                 | 21.406  | 40.834   | 2.215       | 13.131       | 45.712                 | 205.704                | 2.308           | 0.703     | 18.679                |
| 01HTS  | 98SF221(c)fn     | c                 | 53.482  | 125.920  | 5.339       | 11.816       | 37.141                 | 179.991                | 1.333           | 0.643     | 18.368                |
| 01HTT  | 98SF221(d)fn     | d                 | 17.031  | 35.198   | 2.870       | 20.836       | 39.998                 | 188.562                | 1.620           | 0.666     | 31.263                |
| 01HQQ  | MD96-4 fn(b)     | s                 | 14.789  | 14.072   | 1.343       | 13.642       | 34.284                 | 222.846                | 1.406           | 0.638     | 21.368                |
| 01HQP  | MD96-4 fn(a)     | t                 | 36.149  | 99.413   | 5.489       | 16.948       | 39.998                 | 145.707                | 1.252           | 0.649     | 26.080                |
| 01HQN  | MD96-4 cs(a)     | u                 | 47.617  | 127.790  | 5.251       | 12.431       | 45.712                 | 231.417                | 2.596           | 0.704     | 17.646                |
| 01HQO  | MD96-4 cs(b)     | v                 | 5.498   | 6.949    | 0.199       | 5.137        | 45.712                 | 179.991                | 2.019           | 0.699     | 7.343                 |
| 01HQQ  | MD96-7 fn (a)    | w                 | 29.825  | 57.238   | 4.576       | 19.427       | 34.284                 | 171.420                | 1.082           | 0.621     | 31.261                |
| 01HQX  | MD96-7 fn(b)     | x                 | 4.990   | 18.324   | 0.902       | 17.832       | 39.998                 | 154.278                | 1.325           | 0.650     | 27.421                |
| 01HQU  | MD96-7 cs (b)    | y                 | 4.590   | 2.616    | 0.321       | 11.339       | 51.426                 | 222.846                | 3.164           | 0.738     | 15.367                |
| 01HQT  | MD96-7 cs(a)     | z                 | 5.198   | 8.834    | 0.310       | 7.848        | 51.426                 | 222.846                | 3.164           | 0.732     | 10.722                |
| 01HRH  | DurangoCG1:l     | --                |         |          |             | 30.001       |                        |                        |                 |           |                       |
| 01HSF  | DurangoCG2:l     | --                |         |          |             | 32.169       |                        |                        |                 |           |                       |
| 01HQG  | DurangoLH4:l     | --                |         |          |             | 32.740       |                        |                        |                 |           |                       |

Data collected at California Institution of Technology (U-Th)/He laboratory using standard methods. 4He released by laser heating of individual apatite grains enclosed in unsealed platinum microcapsules. 4He masses determined by quadrupole mass spectrometry, calibrated against 3He spike. U and Th concentrations determined by dissolving grains, adding U and Th isotopic spikes, and analyzing by inductively coupled plasma mass spectrometry. Grain sizes determined by measurement with optical microscope calibrated against stage micrometer. Ft correction factor (Farley et al., 1996) calculated from grain diameter only. Durango apatite standard analyzed as check on analyses.



TABLE DR4. MODELING OF (U-Th)/He AGES FROM THE MT. DIABLO AREA\*

**Sample Information**

|                         |          |          |          |          |            |            |
|-------------------------|----------|----------|----------|----------|------------|------------|
| Sample Number           | 98SF-216 | 98SF-221 | 98SF-201 | 98SF-212 | MD96-4     | MD96-7     |
| Unit                    | GVG      | GVG      | GVG      | GVG      | Franciscan | Franciscan |
| Stratigraphic Depth (m) | 6000 m   | 5200 m   | 5300 m   | 7625 m   | ---        | ---        |

**Time-Temperature Points Input into Models for Each Sample**

|                          |             |             |             |             |            |         |
|--------------------------|-------------|-------------|-------------|-------------|------------|---------|
| GVG He Start Age**       | 105 Ma-10°  | 93 Ma-10°   | 97 Ma-10°   | 141 Ma-10°  | ---        | ---     |
| GVG Depositional Age     | 82 Ma-10°   | 78 Ma-10°   | 80 Ma-10°   | 105 Ma-10°  | ---        | ---     |
| FC Exhumation Underway   | ---         | ---         | ---         | ---         | 65 Ma-100° | <--same |
| GVG Start Exhumation     | 52.5 Ma-40° | 52.5 Ma-32° | 52.5 Ma-33° | 52.5 Ma-56° | ---        | ---     |
| GVG Start Rapid Burial   | 52 Ma-15°   | <--same     | <--same     | <--same     | ---        | ---     |
| Start Slow Burial        | 40 Ma-30°   | <--same     | <--same     | <--same     | <--same    | <--same |
| Start Rapid Burial       | 11 Ma-35°   | <--same     | <--same     | <--same     | <--same    | <--same |
| Max Burial-Vary Tmax†    | 3.5 Ma-Vary | <--same     | <--same     | <--same     | <--same    | <--same |
| Samples at Surface Today | 0 Ma-20°    | <--same     | <--same     | <--same     | <--same    | <--same |

**Single Grain Data Input into Models and Resulting Fitted Activation Energies (A<sub>e</sub>, kcal/mol)**

|                                                     |          |          |        |        |          |          |
|-----------------------------------------------------|----------|----------|--------|--------|----------|----------|
| Grain Designations††                                | k (a-cs) | a (a-cs) | e (a)  | o (a)  | s (fn-b) | w (fn-a) |
| Grain Radius (microns)                              | 62.854   | 51.426   | 37.141 | 37.141 | 34.284   | 34.284   |
| Measured He Age (Ma)                                | 36.93    | 22.19    | 31.81  | 45.46  | 21.37    | 31.26    |
| Fitted A <sub>e</sub> for T <sub>max</sub> =70°C    | 32.67    | 32.63    | 33.27  | 33.42  | 33.51    | 33.97    |
| Fitted A <sub>e</sub> for T <sub>max</sub> =73.73°C | 32.96    | 32.93    | 33.57  | 33.67  | 33.80    | 34.25    |
| Grain Designations††                                | l (b-cs) | b (b-cs) | f (b)  | p (b)  | t (fn-a) | x (fn-b) |
| Grain Radius (microns)                              | 62.854   | 45.712   | 39.998 | 37.141 | 39.998   | 39.998   |
| Corrected He Age (Ma)                               | 23.98    | 18.68    | 29.03  | 20.80  | 26.08    | 27.42    |
| Fitted A <sub>e</sub> for T <sub>max</sub> =70°C    | 32.37    | 32.69    | 33.11  | 32.98  | 33.52    | 33.58    |
| Fitted A <sub>e</sub> for T <sub>max</sub> =73.73°C | 32.65    | 32.98    | 33.40  | 33.23  | 33.80    | 33.86    |
| Grain Designations††                                | m (c-fn) | c (c-fn) | g (c)  | q (d)  | u (cs-a) | y (cs-b) |
| Grain Radius (microns)                              | 45.712   | 37.141   | 45.712 | 48.569 | 45.712   | 51.426   |
| Corrected He Age (Ma)                               | 55.47    | 18.37    | 26.35  | 33.84  | 17.65    | 15.37    |

|                                         |        |          |        |        |          |          |
|-----------------------------------------|--------|----------|--------|--------|----------|----------|
| Fitted Ae for T <sub>max</sub> =70°C    | 33.50  | 32.95    | 32.87  | 32.88  | 32.97    | 32.72    |
| Fitted Ae for T <sub>max</sub> =73.73°C | 33.81  | 33.25    | 33.16  | 33.13  | 33.26    | 33.01    |
| Grain Designations††                    | n (d)  | d (d-fn) | h (d)  | r (c)  | v (cs-b) | z (cs-a) |
| Grain Radius (microns)                  | 42.855 | 39.998   | 45.712 | 51.426 | 45.712   | 51.426   |
| Corrected He Age (Ma)                   | 13.71  | 31.26    | 47.85  | 28.00  | 7.34     | 10.72    |
| Fitted Ae for T <sub>max</sub> =70°C    | 32.58  | 33.19    | 33.40  | 32.70  | 32.45    | 32.49    |
| Fitted Ae for T <sub>max</sub> =73.73°C | 32.88  | 33.49    | 33.71  | 32.95  | 32.74    | 32.78    |
| Grain Designations††                    |        |          | i (e)  |        |          |          |
| Grain Radius (microns)                  |        |          | 62.854 |        |          |          |
| Corrected He Age (Ma)                   |        |          | 36.00  |        |          |          |
| Fitted Ae for T <sub>max</sub> =70°C    |        |          | 32.70  |        |          |          |
| Fitted Ae for T <sub>max</sub> =73.73°C |        |          | 33.00  |        |          |          |
| Grain Designations††                    |        |          | j (f)  |        |          |          |
| Grain Radius (microns)                  |        |          | 68.568 |        |          |          |
| Corrected He Age (Ma)                   |        |          | 62.27  |        |          |          |
| Fitted Ae for T <sub>max</sub> =70°C    |        |          | 33.35  |        |          |          |
| Fitted Ae for T <sub>max</sub> =73.73°C |        |          | 33.65  |        |          |          |

**Mean and  
Range  
Of All  
Samples**

**Mean and Range of Ae for Each Sample for Two Different T<sub>max</sub> at 3.5 Ma**

|                                       |       |       |       |       |       |       |              |
|---------------------------------------|-------|-------|-------|-------|-------|-------|--------------|
| Mean Ae for T <sub>max</sub> =70°C    | 32.78 | 32.87 | 33.12 | 33.00 | 33.11 | 33.19 | <b>33.01</b> |
| Ea Range for sample                   | 1.13  | 0.56  | 0.70  | 0.72  | 1.07  | 1.48  | <b>1.60</b>  |
| Mean Ae for T <sub>max</sub> =73.73°C | 33.08 | 33.16 | 33.42 | 33.25 | 33.40 | 33.48 | <b>33.30</b> |
| Ea Range for sample                   | 1.16  | 0.56  | 0.71  | 0.72  | 1.06  | 1.47  | <b>1.60</b>  |

\*Modeling was completed using the program of K. Farley (personal communications, 2003). Remaining parameters used were: Log10Do = 1.50 cm<sup>2</sup>/s; U = 1.00 ppm; Th = 1.00 ppm (computations are insensitive to actual U and Th); Alpha Ejection ON; Delta-t = 0.50 myrs; N = 8 (2\*8 grid points). The activation energies (Ae) were varied by trial and error until the observed He ages were matched.

\*\*The He "Start" Ages for the Great Valley and Eocene samples are the time at which He retention was assumed to begin for each apatite grain. Retention probably began when apatite in the samples first cooled below about 85°C while the apatite grains still resided in rocks in the sediment source areas before they were eroded and deposited into the Great Valley forearc basin. For the modeling, these start ages were assumed to be 5 million years younger than the modeled fission track provenance ages. Those provenance ages approximate the time of cooling of the apatite grains below about 100°C in sediment source areas. Figure FTDR-3B shows the approximate percent resetting exhibited by each apatite grain. Those values were computed as follows: Percent Reset = 100% x (Observed He Age - 3.5 Ma)/(He Start Age - 3.5 Ma). This calculation yields the approximate proportion of the total 4He that had been released from the grain up until and including the time of T<sub>max</sub> at 3.5 Ma.

†Several temperatures at 3.5 Ma were modeled. Results for T<sub>max</sub> = 70°C and 73.73°C are included here.

††Two designations are given, a simplified designation ("a" to "z") used in Figure FT-1 and the designation used during the laboratory measurements (in parentheses).

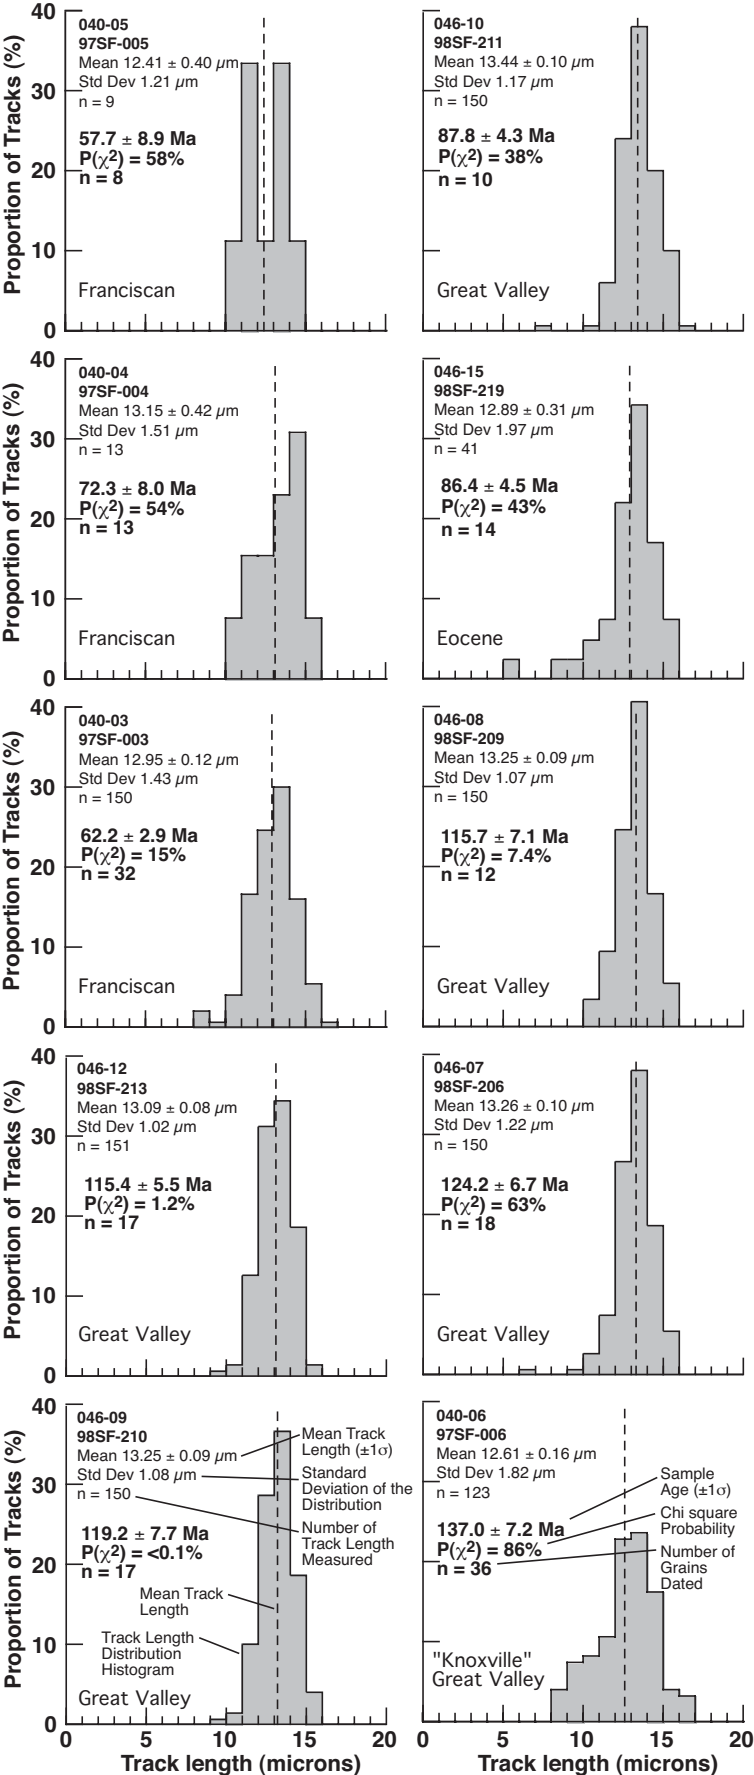

Unruh et al., Figure DR1  
Data Repository Only  
January10, 2007

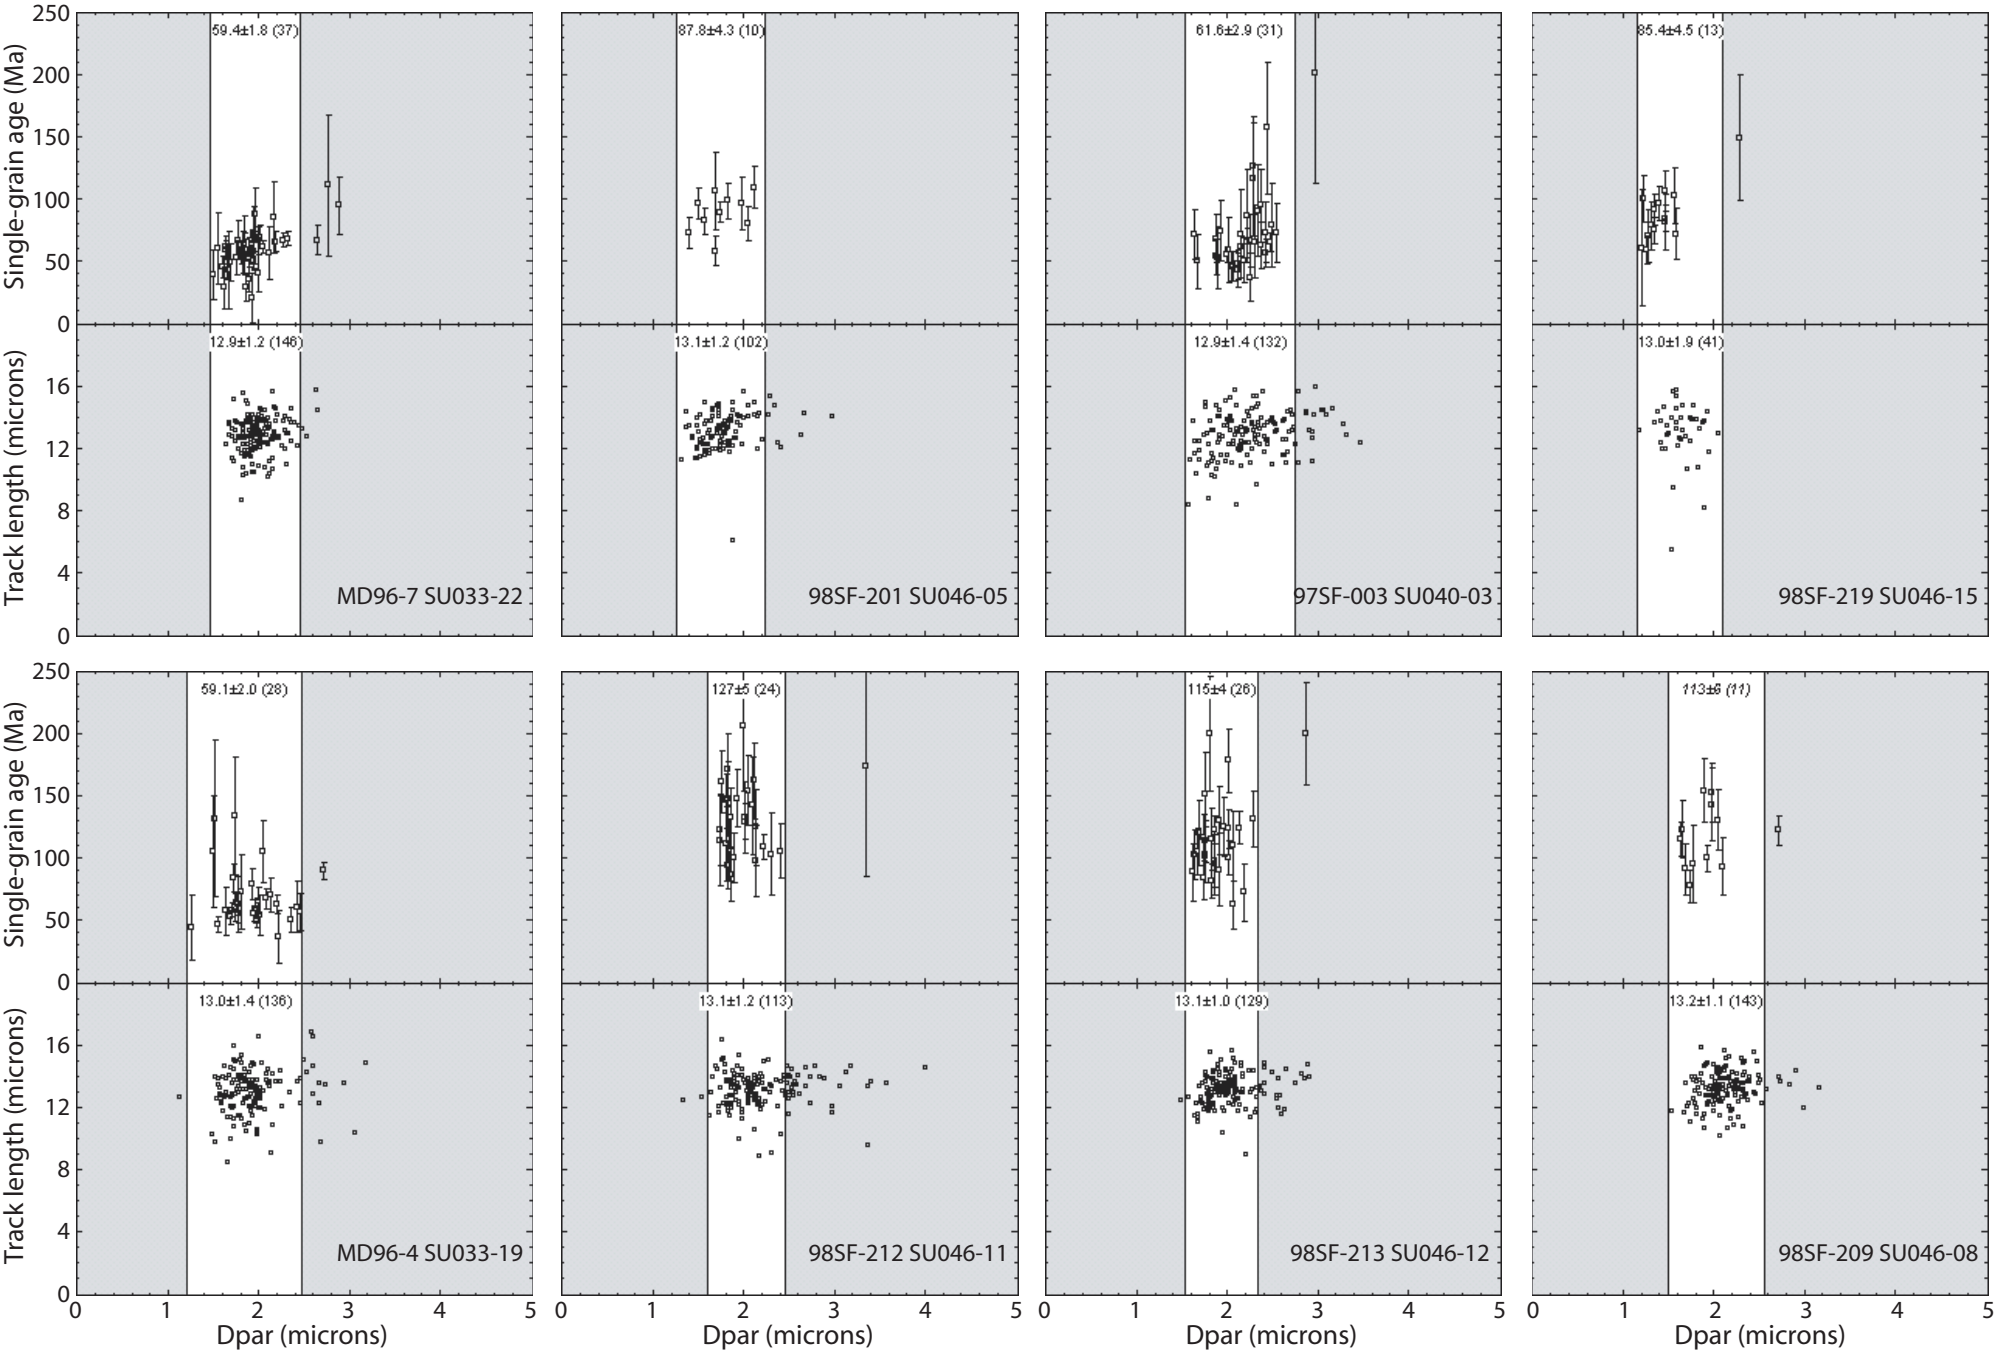

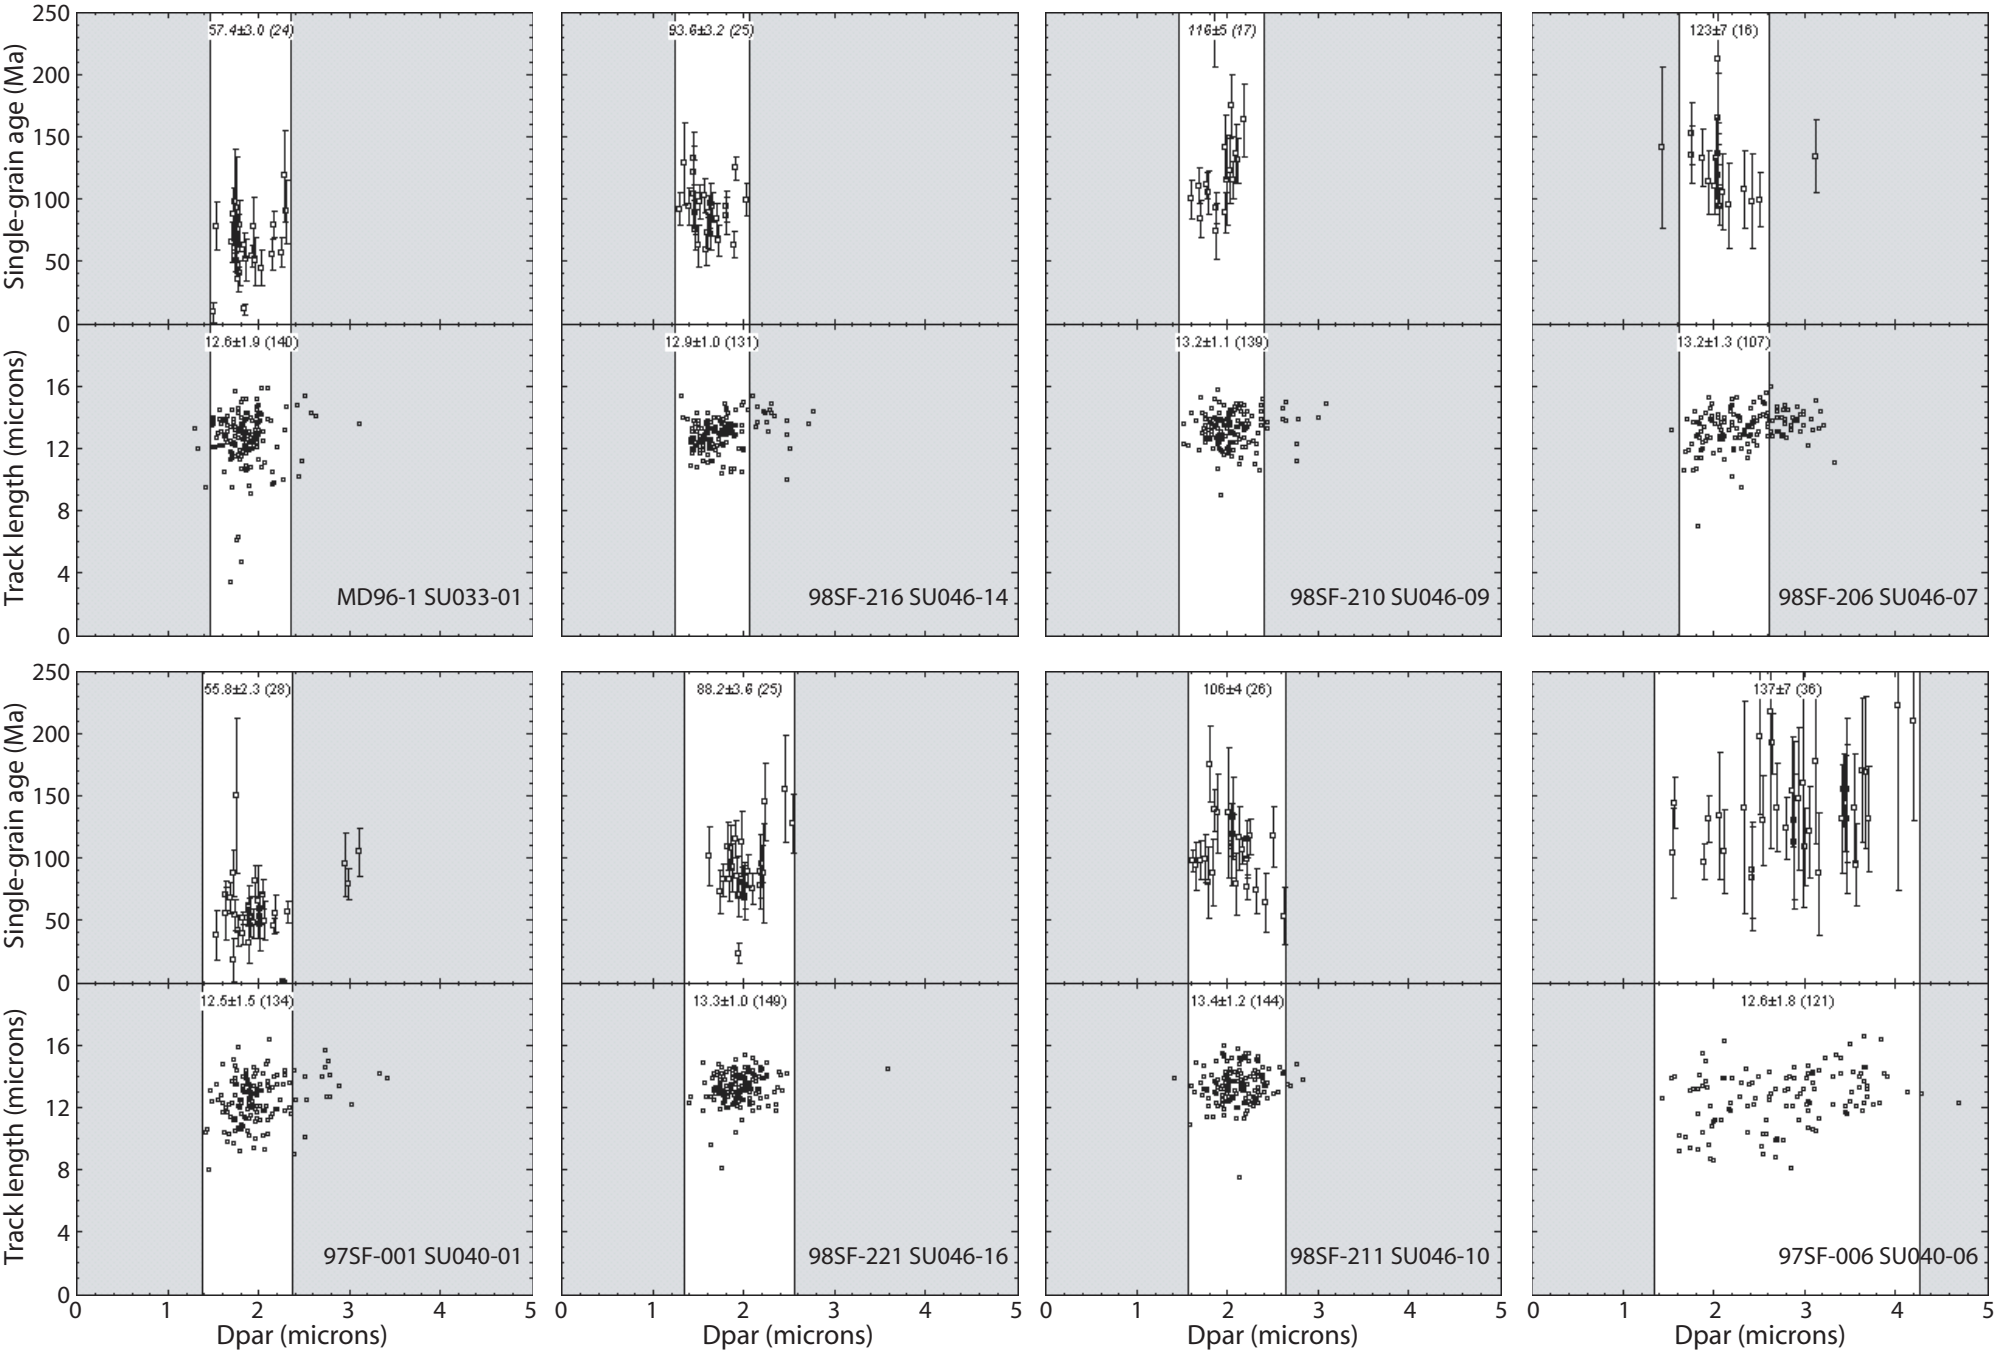

Unruh et al., Diablo, Figure DR2 (page 2 of 2)

10 June 2006

Illustrator CS2 file

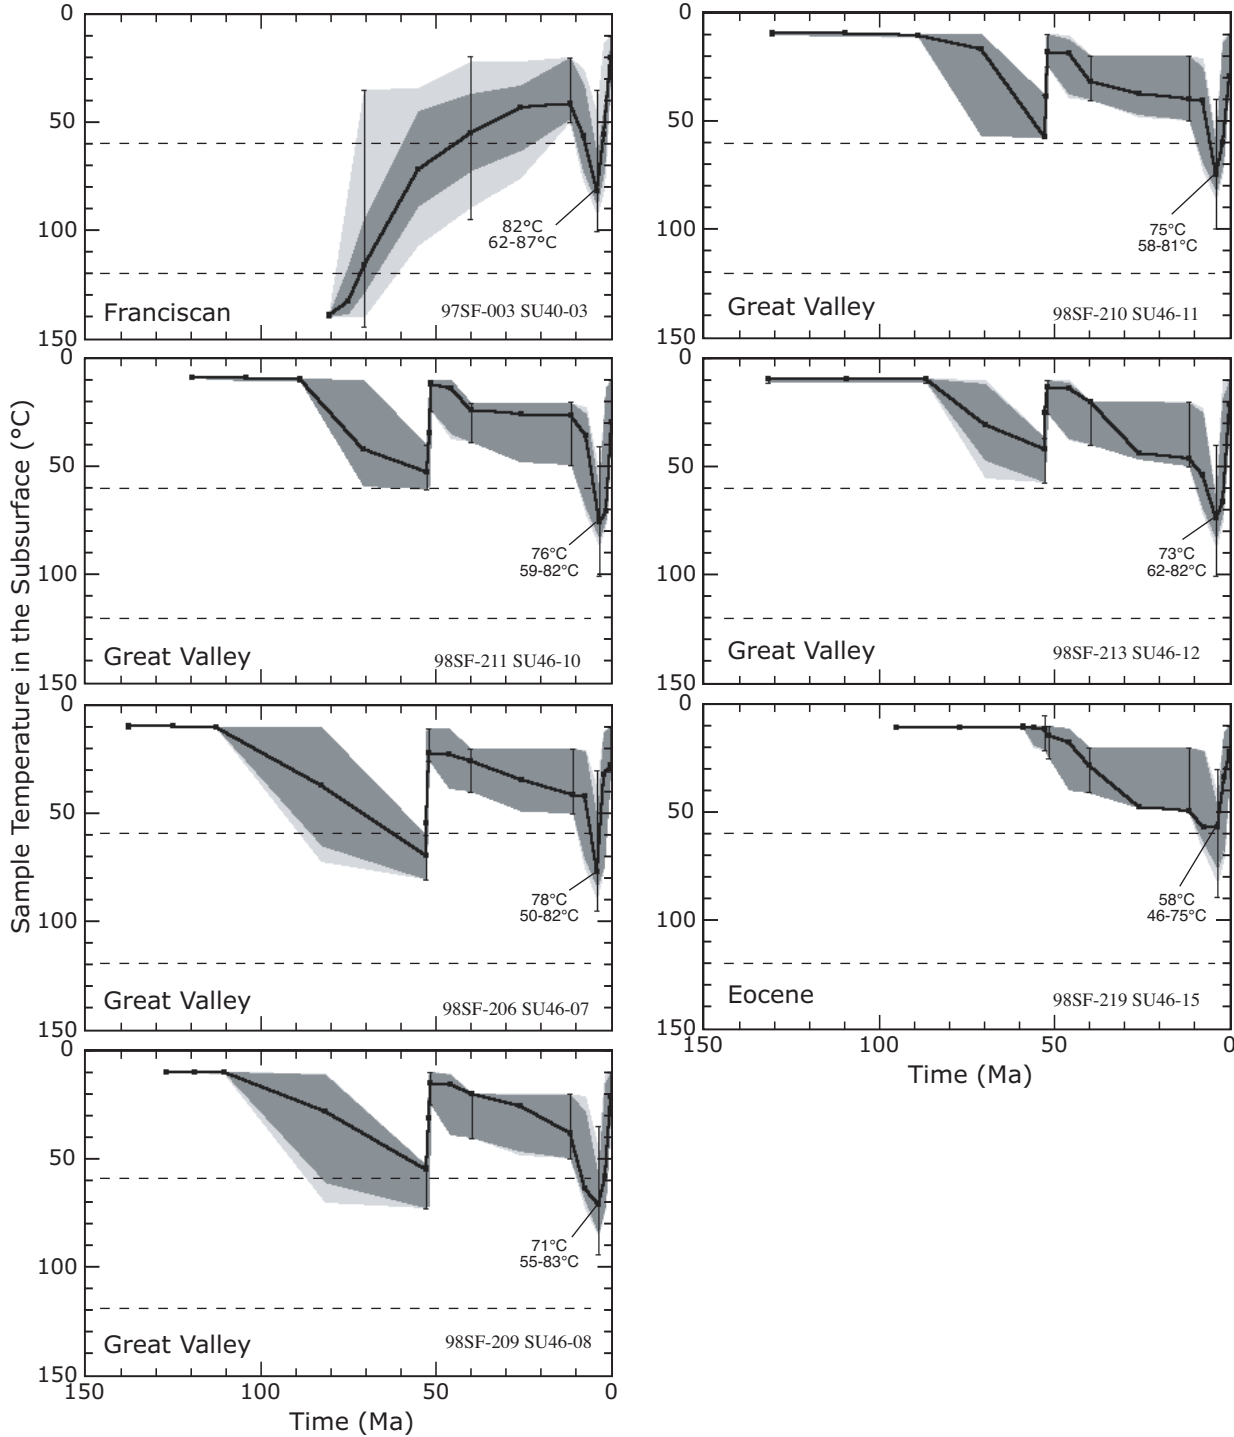

Unruh et al., Figure DR3  
 Data Repository Only  
 10 June 2006  
 Illustrator CS2 file

Contains objects transferred from modeling program screen shots via Photoshop;  
 figure contains two distinct levels of gray shading.

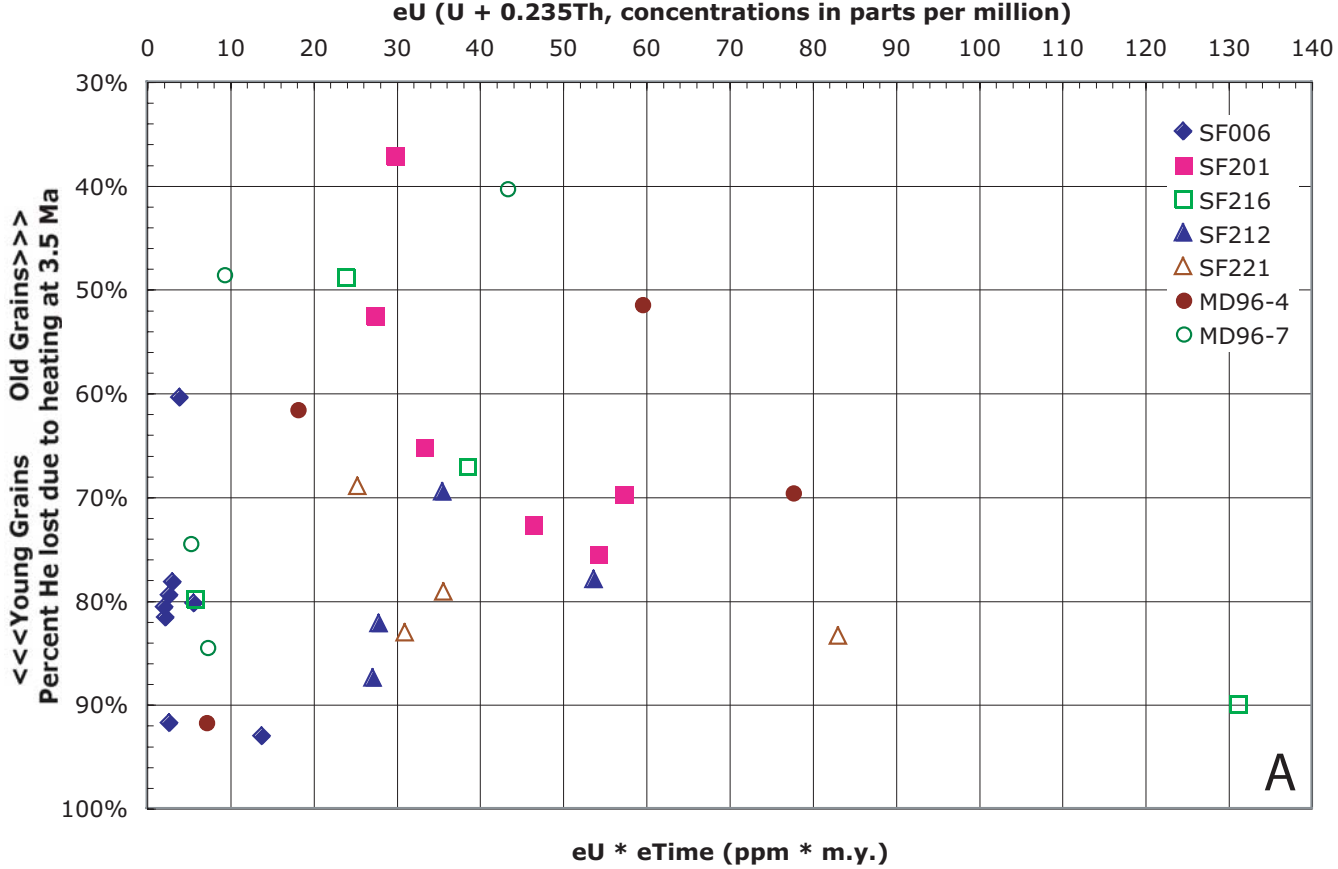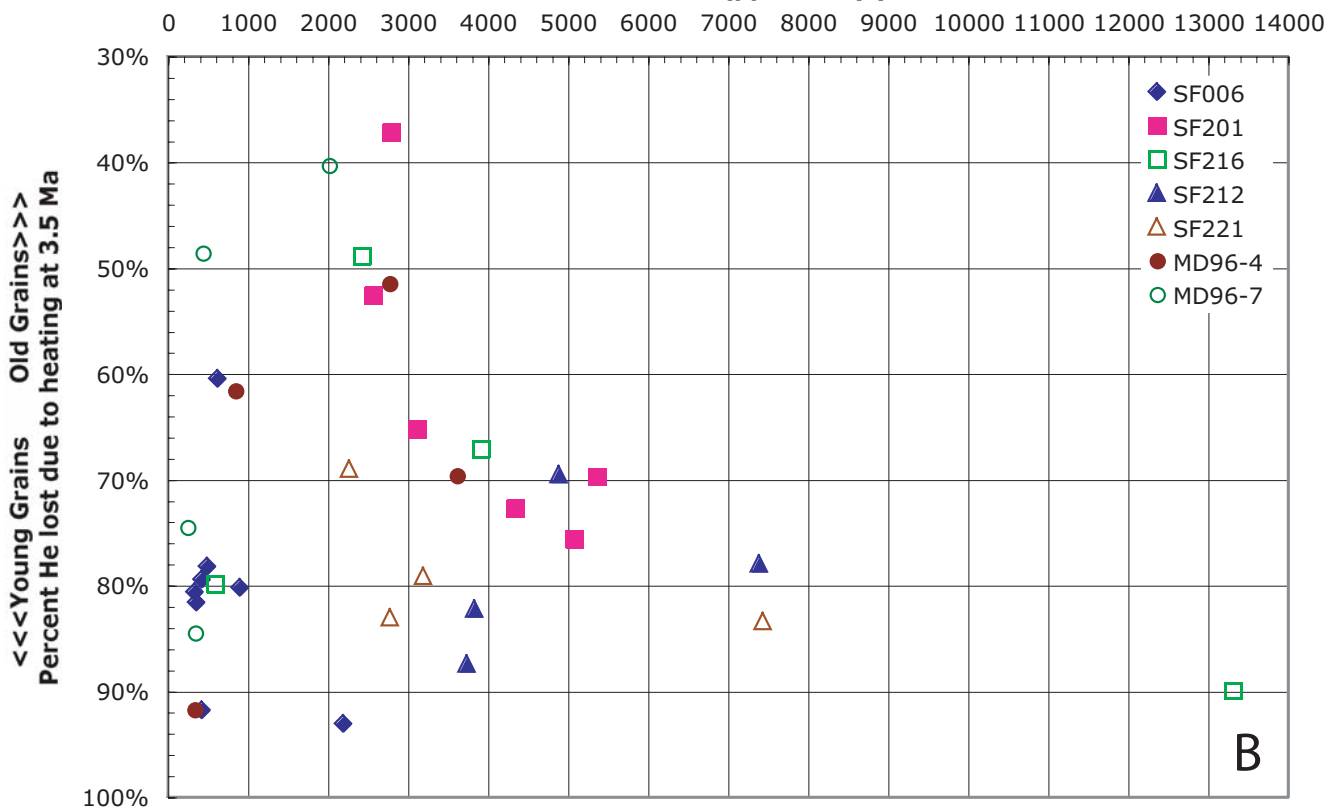

Figure DR4  
Unruh et al., Mt Diablo  
10 January 2007  
Illustrator CS2 file (originally Excel file)  
Color symbols may be printed color or black and white

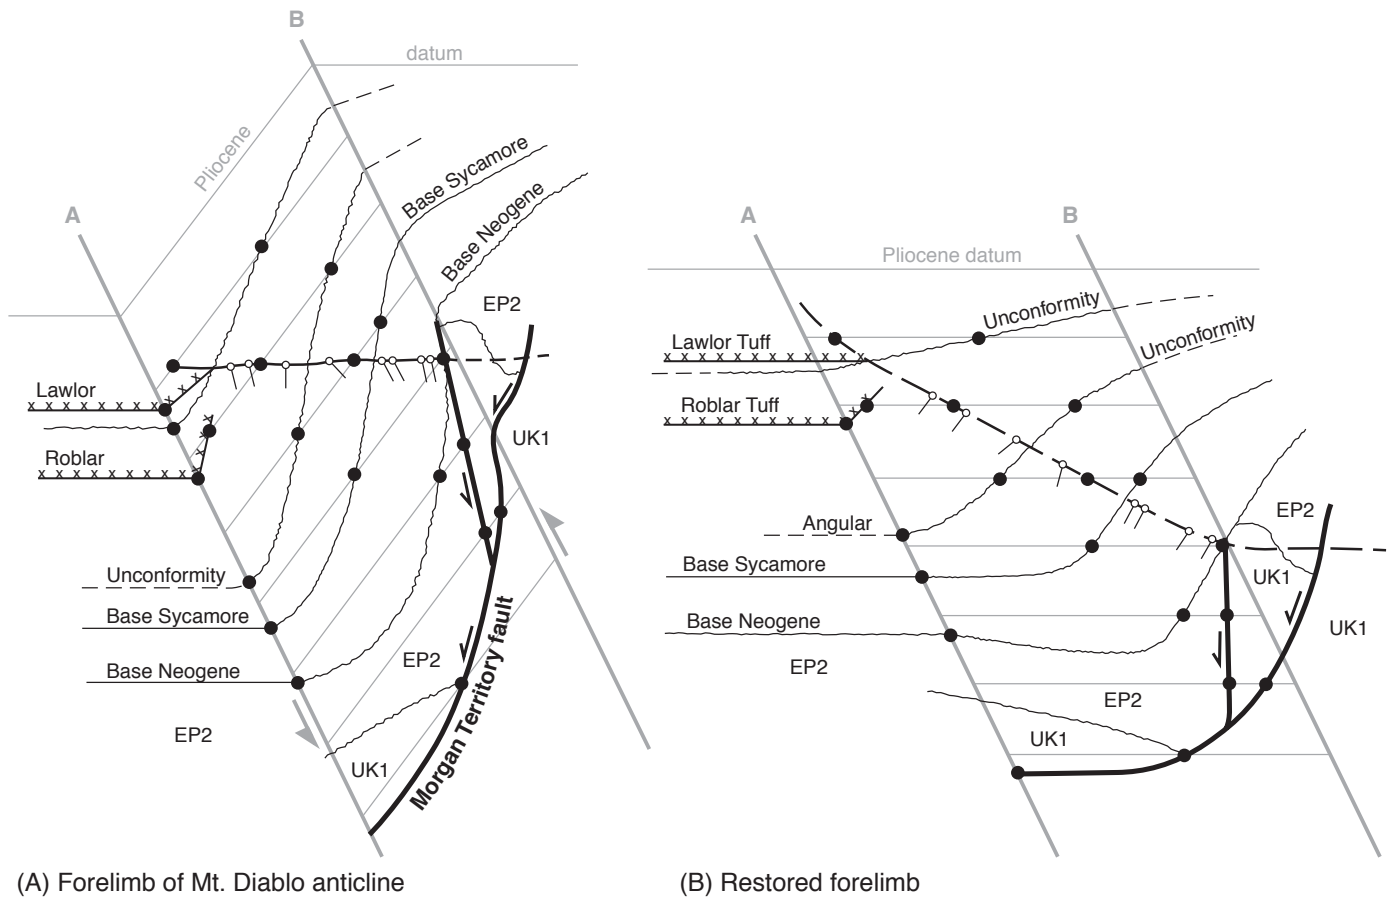

Figure DR5: In developing restored cross sections, we assume a kink-band-propagation style of folding (Suppe, 1983; Suppe and Medwedeff, 1990) and account for the effect of distributed simple shear in the fold limbs by using a graphical approach to transform pre-existing faults and bedding contacts from the deformed to the undeformed state. Shearing of fold limbs during deformation is illustrated by comparing the geometry of the parallelogram defined by the A and B hinge lines in the deformed (Panel A) and restored (Panel B) states. We assume that shear during fold growth is accommodated by distributed reverse slip along planes parallel to dip of the fold limb; in general, these planes need not be parallel to bedding. In cross-section, the shear planes are lines of no finite extension. Intersections of bedding, faults and other features with these lines form a grid of points that is used graphically to map the deformed geometry (Panel A) to the restored geometry (Panel B). Although the distances between points along the lines are the same in both the deformed and restored states, the lengths and angular relationships of lines that connect these points between shear planes are different in the two states due to simple shear of the fold limb.
